# Supplementary material
Source: PubMed Central journal article supplement (PMC6309406)
Supplement: NIHMS983824-supplement-2.pdf [file NIHMS983824-supplement-2.pdf]

## Supplementary Materials for

### **Vasopressin stimulates the proliferation and differentiation of red blood cell precursors and improves recovery from anemia**

Balázs Mayer, Krisztián Németh, Miklós Krepuska, Vamsee D. Myneni, Dragan Maric, John F. Tisdale, Matthew M. Hsieh, Naoya Uchida, Heon-Jin Lee, Michael J. Nemeth, Kenn Holmbeck, Constance Tom Noguchi, Heather Rogers, Soumyadeep Dey, Arne Hansen, Jeffrey Hong, Ian Chow, Sharon Key, Ildikó Szalayova, Jerome Pagani, Károly Markó, Ian McClain-Caldwell, Lynn Vitale-Cross, W. Scott Young, Michael J. Brownstein, Éva Mezey\*

\*Corresponding author. Email: mezeye@mail.nih.gov

Published 29 November 2017, *Sci. Transl. Med.* **9**, eaao1632 (2017)

DOI: 10.1126/scitranslmed.aao1632

#### **The PDF file includes:**

Fig. S1. AVP agonists affect intracellular calcium, and AVP increases cAMP in human progenitors.

Fig. S2. Norepinephrine and AVP induce an increase in the number of BFU-E colonies.

Fig. S3. AVP and AVPR1B agonist [d(Cha<sup>4</sup>)-AVP] increase BFU-E formation.

Fig. S4. Band intensities from Western blots were analyzed by ImageJ.

Fig. S5. Response to anemia is coordinated by AVP and EPO.

Table S2. Human RT-PCR primers.

Table S3. Mouse RT-PCR primers.

Table S4. Mouse real-time PCR primers.

Table S5. Antibodies used for flow cytometry.

#### **Other Supplementary Material for this manuscript includes the following:**

(available at

[www.sciencetranslationalmedicine.org/cgi/content/full/9/418/eaao1632/DC1](http://www.sciencetranslationalmedicine.org/cgi/content/full/9/418/eaao1632/DC1))

Table S1. RBC indices for patients (provided as an Excel file).

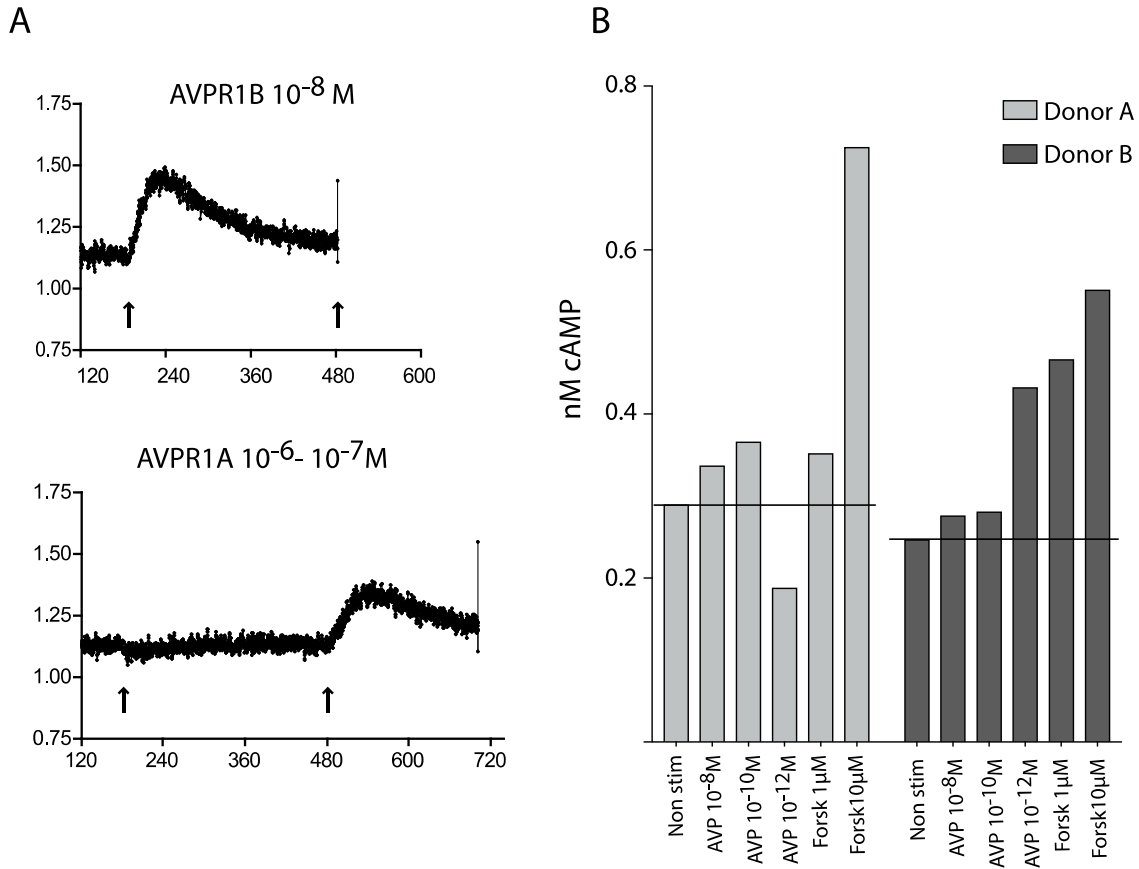

**Fig. S1. AVP agonists affect intracellular calcium, and AVP increases cAMP in human progenitors. (A)** AVPR1B at  $10^{-8}$  M concentration induces intracellular calcium in HSPCs ( $CD34^{+}$  cells), whereas an AVPR1A agonist has effect at a 100-fold higher dose. **(B)** AVP stimulation also increases cAMP concentrations. In two consecutive experiments,  $CD34^{+}$  cells from two different donors were plated. AVP increased cAMP concentrations in stimulated vs. non-stimulated cells. Forskolin was used as positive control in both experiments in (B).

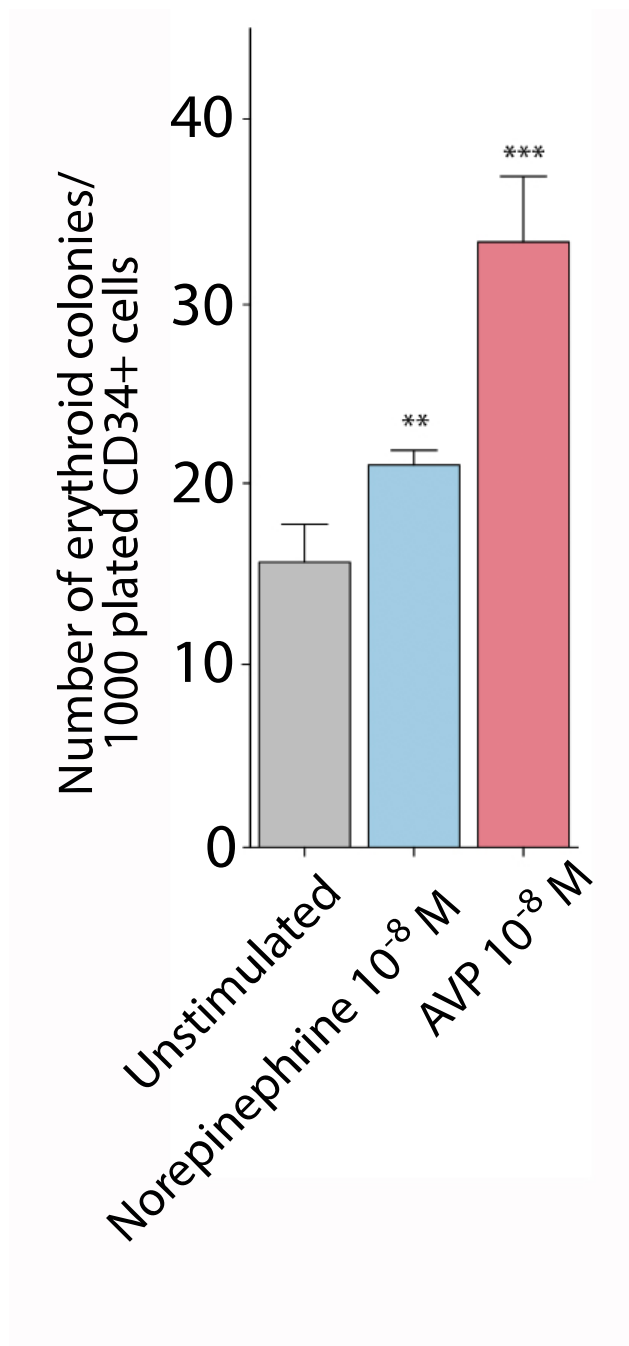

**Fig. S2. Norepinephrine and AVP induce an increase in the number of BFU-E colonies.** BFU-E colony-forming assay done with norepinephrine as positive control, along with AVP. Error bars represent mean+SD; \*\*p<0.01; \*\*\*p<0.001.

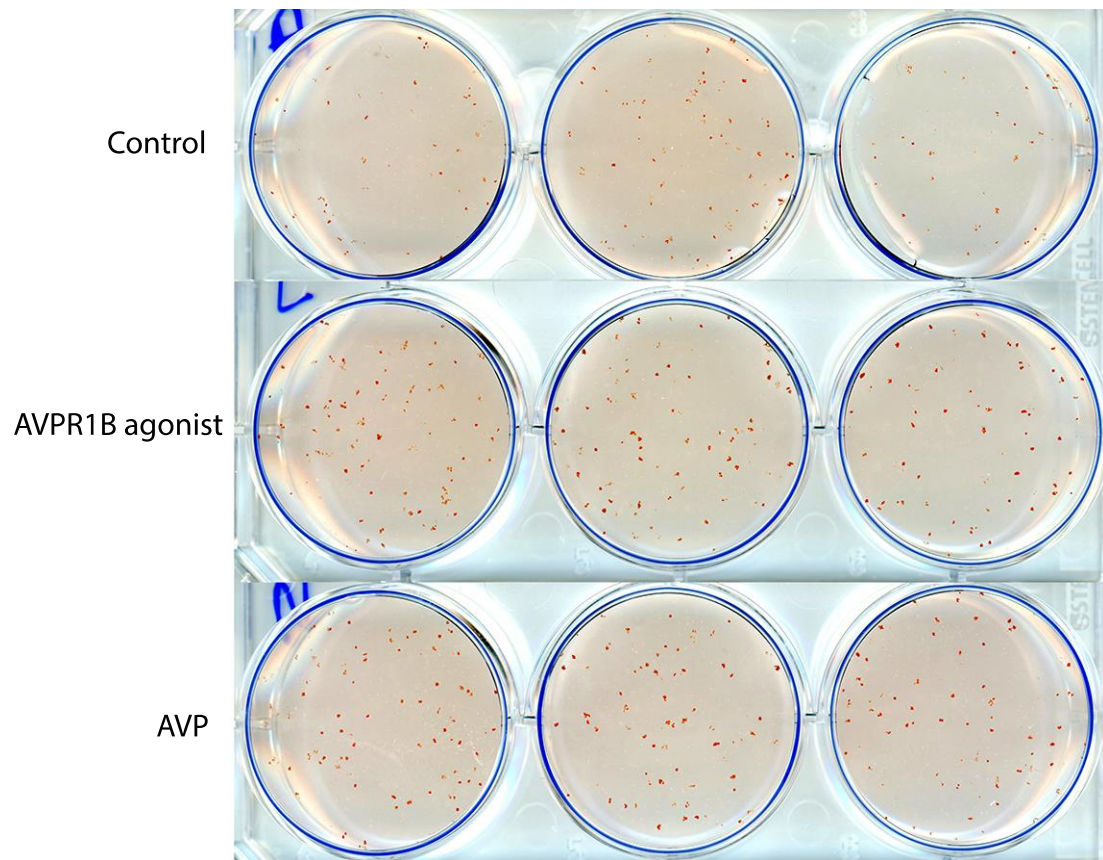

**Fig. S3. AVP and AVPR1B agonist [d(Cha<sup>4</sup>)-AVP] increase BFU-E formation.** Methylcellulose assay of human CD34<sup>+</sup> cells, plates scanned at Day 14 are shown in triplicates. The red dots are BFU-E colonies.

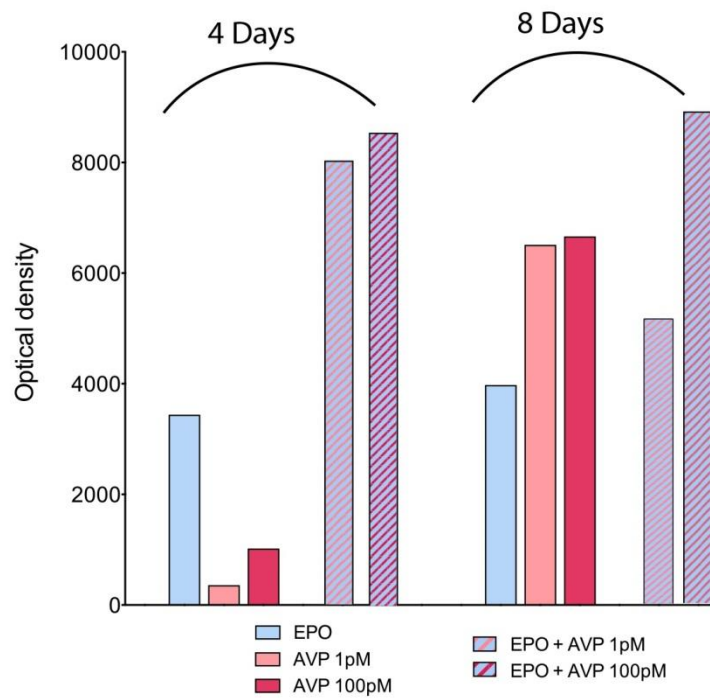

**Fig. S4. Band intensities from Western blots were analyzed by ImageJ.**

Quantitative evaluation of STAT5 phosphorylation after EPO and/or AVP treatment of developing erythroid progenitors in vitro. Western blots are shown in Fig. 2F. The optical densities of the bands were measured using Image J software.

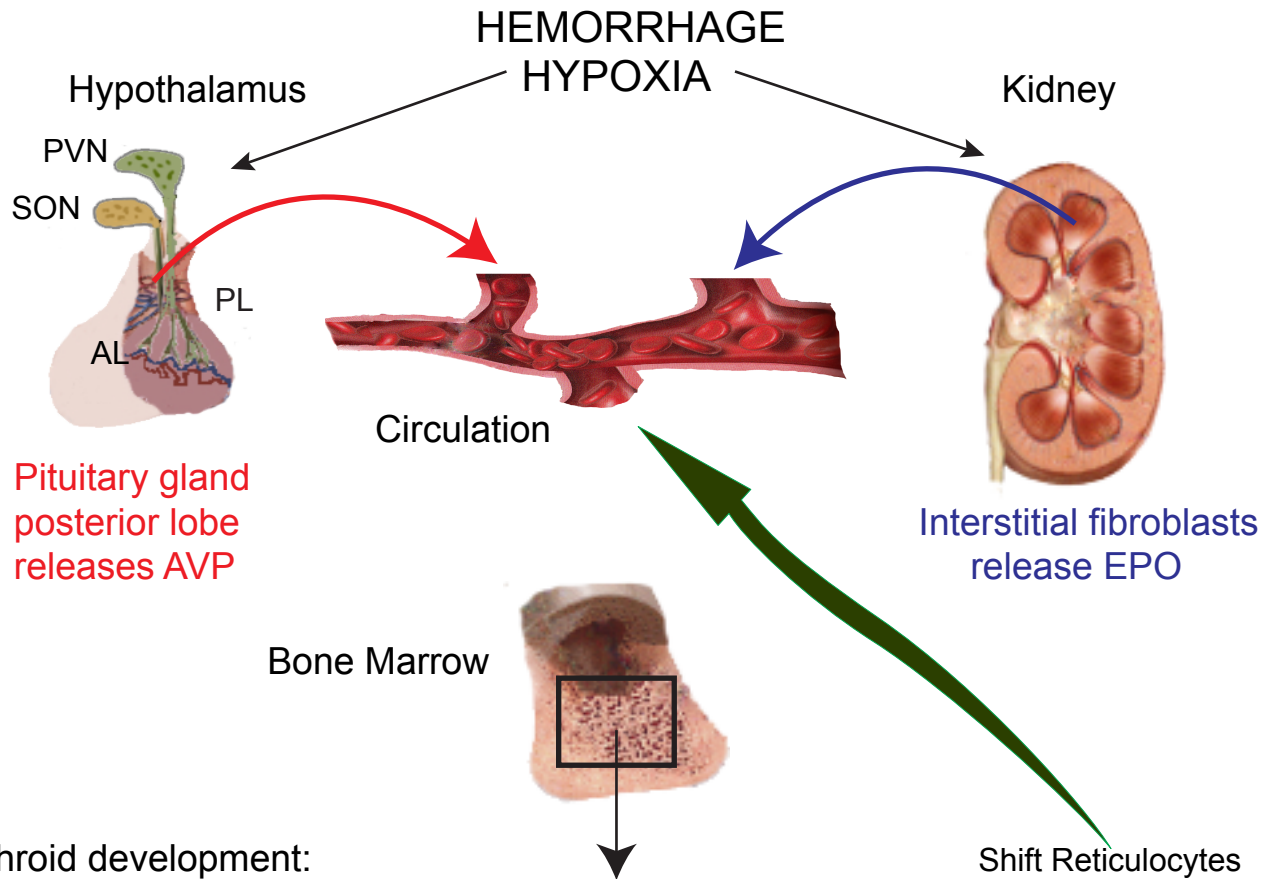

Erythroid development:

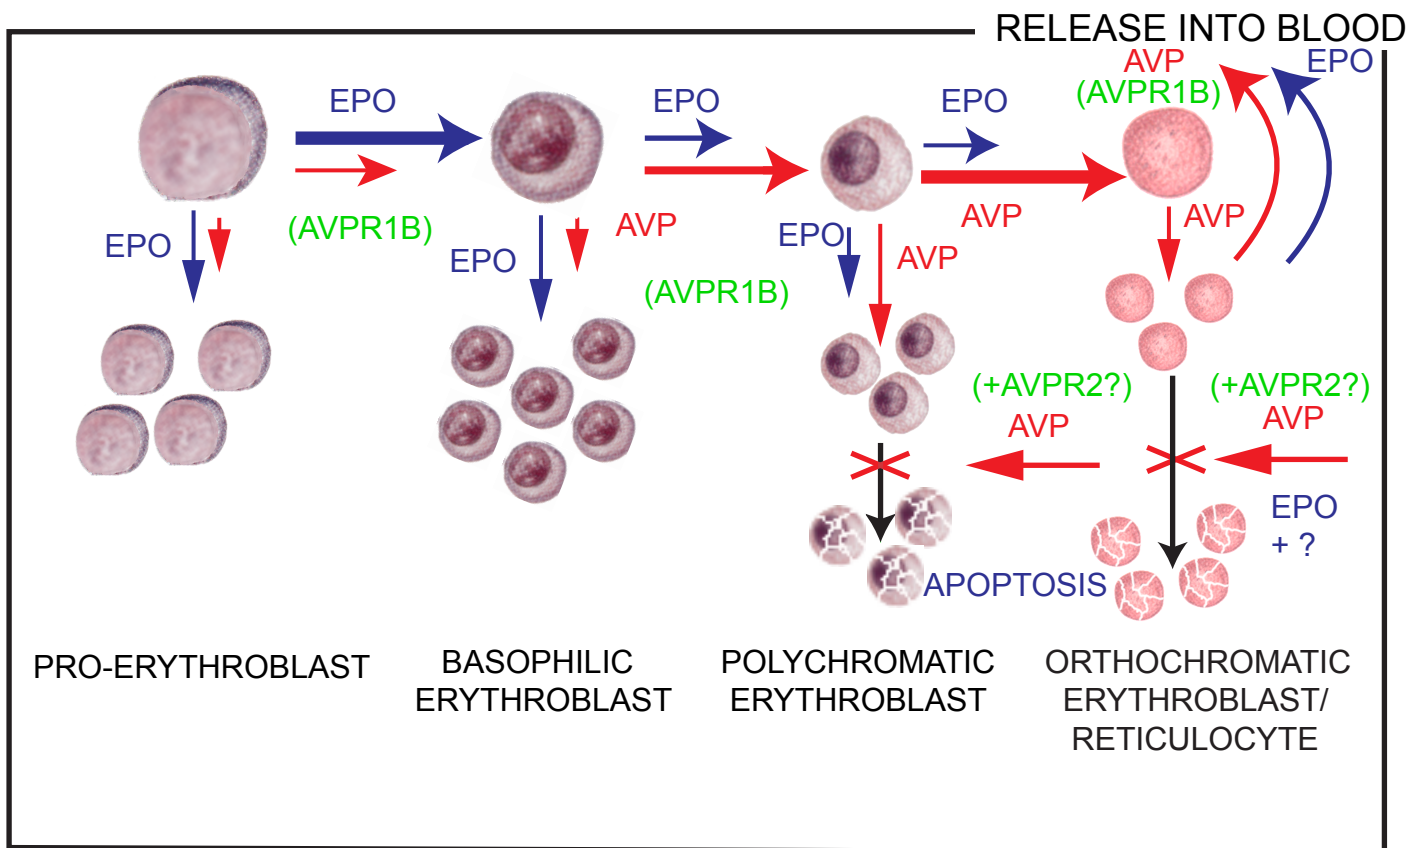

**Fig. S5. Response to anemia is coordinated by AVP and EPO.**

In response to blood loss or hypoxia, AVP is released into the blood from the hypothalamo-hypophyseal system, and EPO is released from the specialized interstitial fibroblasts of the kidney. EPO induces proliferation of proerythroblasts and basophilic erythroblasts, as well as their further differentiation. AVP induces proliferation of polychromatic and orthochromatic erythroblasts, and might speed up the differentiation/maturation of young reticulocytes into mature reticulocytes. AVPR1B receptors appear to mediate the effects of AVP on cellular proliferation and differentiation. In addition, AVP might also decrease apoptosis in the most mature population of reticulocytes. Both EPO and AVP participate in releasing cells into the circulation, but AVP may speed the maturation of immature red cells (shift-reticulocytes) and cause their quick release from the bone marrow. This could contribute to a rapid increase in hematocrit. The red arrows suggest roles for AVP, whereas the blue arrows demonstrate well-known roles of EPO.

Abbreviations: AL-anterior lobe of the pituitary gland; PL-posterior (neural) lobe of the pituitary gland; PVN-paraventricular hypothalamic nucleus; SON-supraoptic hypothalamic nucleus

**Table S2. Human RT-PCR primers.**

| Target                           | Primer sequence                                                                                                     | PCR product size | Annealing temp | Cycles |
|----------------------------------|---------------------------------------------------------------------------------------------------------------------|------------------|----------------|--------|
| Human <i>AVPR1A</i><br>NM_000706 | hu <i>AVPR1A</i> for 1:<br>CCGCCTGGGTGCTGAGCTTC<br>hu <i>AVPR1A</i> rev 1:<br>TCTTCCCGCGGACGTTGCAC<br>1 step RT-PCR | 234 bp           | 65°C           | 45     |
| Human <i>AVPR1B</i><br>NM_000707 | hu <i>AVPR1B</i> for1:<br>GGCTGCCATCTCGGGTCAGC<br>hu <i>AVPR1B</i> rev1:<br>CAGGCAAGGTGACGCAGGGG                    | 283 bp           | 55°C           | 45     |
| Human <i>AVPR2</i><br>NM_000054  | Hu <i>AVPR2</i> for:<br>ATTCATGCCAGTCTGGTGC<br>Hu <i>AVPR2</i> rev:<br>TCACGATGAAGTGCCTTGG <sup>1</sup>             | 423 bp           | 58°C           | 45     |



**Table S3. Mouse RT-PCR primers.**

| Target                              | Primer sequence                                                                               | PCR product size | Annealing temp | Cycles |
|-------------------------------------|-----------------------------------------------------------------------------------------------|------------------|----------------|--------|
| Mouse<br><i>Avpr1a</i><br>NM_016847 | ms <i>Avpr1a</i> F:<br>CAGATGTGGTCAGTCTGGGATA<br>m <i>Avpr1a</i> R:<br>CTCATGCTATCCGAGTCATCCT | 215 bp           | 60°C           | 45     |
| Mouse<br><i>Avpr1b</i><br>NM_011924 | ms <i>Avpr1b</i> F:<br>GCTGGCCCAAGTCCTCATCTTCTG<br><i>Avpr1b</i> R: GCGGTGACTCAGGGAACGT       | 323 bp           | 60°C           | 45     |
| Mouse<br><i>Avpr2</i><br>NM_019404  | ms <i>Avpr2</i> for 1:<br>CACGTCTGCAGTGCCTGGGG<br>ms <i>Avpr2</i> 1:<br>CATGGAAGCGGTTCGGTGGCA | 302 bp           | 62°C           | 45     |

**Table S4. Mouse real-time PCR primers.**

| Target                              | Primer sequence                                    |
|-------------------------------------|----------------------------------------------------|
| Mouse<br><i>Avpr1a</i><br>NM_016847 | F: TAGGCCTGGTTCGTAAGCAT<br>R: TTCAATCACGGACCAGTTCA |
| Mouse<br><i>Avpr1b</i><br>NM_011924 | F: ATCCGAACCGTGAAGATGAC<br>R: TCATTAGGGGCATTCTCGTC |
| Mouse<br><i>Avpr2</i><br>NM_019404  | F: CAAGGGACACCCTGGTTCTA<br>R: CTACGCAACTCCGAGGAGAC |
| <i>Tbp</i>                          | Ms_Tbp_1_SG QuantiTect Primer                      |

**Table S5. Antibodies used for flow cytometry**

| <b><i>Antibodies</i></b> | <b><i>Clones</i></b> | <b><i>Fluorochromes</i></b> | <b><i>Source</i></b>            |
|--------------------------|----------------------|-----------------------------|---------------------------------|
| <i>anti-mouse</i>        |                      |                             |                                 |
| Gr-1 (Ly-6G)             | RB6-8C5              | APC-eFluor 780              | Ebiosciences                    |
| B220 (CD45R)             | RA3-6B2              | PE-Cy7                      | Ebiosciences                    |
| TER-119                  | TER-119              | APC                         | Ebiosciences/<br>BD Biosciences |
| CD3e                     | 145-2C11             | PE                          | Ebiosciences                    |
| CD11b (Mac-1)            | M1/70                | PerCp-eFluor710             | Ebiosciences                    |
| CD71                     | C2                   | PE                          | BD Biosciences                  |
| CD41                     | MWReg30              | FITC                        | BD Biosciences                  |
| CD61                     |                      | PE                          | BD Biosciences                  |
| sca1 (Ly-6A/E)           | D7                   | FITC or PE-Cy7              | BD Biosciences/<br>Ebiosciences |
| c-kit (CD117)            | 2B8                  | APC                         | BD Biosciences                  |
| CD34                     | RAM34                | AlexaFluor700               | Ebiosciences                    |
| CD150                    | mShad150             | PE                          | Ebiosciences                    |
| CD48                     | HM48-1               | PerCp Cy5.5                 | Ebiosciences                    |
| IL-7R (CD127)            | A7R34                | PerCpCy5.5                  | Ebiosciences                    |
| CD44                     |                      | APC                         | BD Biosciences                  |
| TER119                   |                      | FITC                        | BD Biosciences                  |
| CD45                     |                      | APC-Cy7                     | BD Biosciences                  |
| CD11b                    |                      | APC-Cy7                     | BD Biosciences                  |
| GR1                      |                      | APC-Cy7                     | BD Biosciences                  |
| CD16/CD32                |                      | Purified Rat anti-mouse     | BD Biosciences                  |
| CD4                      |                      | Biotin                      | Ebiosciences                    |
| CD8                      |                      | Biotin                      | Ebiosciences                    |
| TER119                   |                      | Biotin                      | Ebiosciences                    |
| Gr-1                     |                      | Biotin                      | Ebiosciences                    |
| CD11b                    |                      | Biotin                      | Ebiosciences                    |
| B220                     |                      | Biotin                      | Ebiosciences                    |
| <i>anti-human</i>        |                      |                             |                                 |
| CD34                     |                      | PE                          | BD Biosciences                  |
| CD38                     |                      | FITC                        | BD Biosciences                  |
