# Supplementary material
Source: PubMed Central journal article supplement (PMC6309406)
Supplement: NIHMS983824-supplement-Table_S1.pdf [file NIHMS983824-supplement-Table_S1.pdf]

| Gender    | Race                 | Number of observations | Months followed | Age at start | last obsen | Hematocrit | Hemoglobin | MCV    | MCH   | MCHC  | RBC   | RDW   | Serum Sodium<br>(135-144 mmol/L) |
|-----------|----------------------|------------------------|-----------------|--------------|------------|------------|------------|--------|-------|-------|-------|-------|----------------------------------|
| Male      | White                | 5                      | 26              | 2.8          | 5          | 35.74      | 11.82      | 81.76  | 27.06 | 33.07 | 4.37  | 13.58 | N                                |
| Female    | Asian                | 16                     | 0               | 8.0          | 8          | 27.99      | 9.46       | 85.18  | 28.75 | 33.80 | 3.29  | 13.48 | N                                |
| Female    | White                | 5                      | 31              | 5.4          | 8          | 37.20      | 11.90      | 86.64  | 27.69 | 31.99 | 4.30  | 13.90 | N                                |
| Female    | White                | 21                     | 15              | 7.8          | 9          | 29.09      | 8.92       | 80.44  | 24.78 | 30.66 | 3.6   | 16.53 | N                                |
| Female    | White                | 7                      | 10              | 9.2          | 10         | 32.16      | 10.39      | 79.51  | 25.72 | 32.31 | 4.04  | 14.21 | N                                |
| Female    | White                | 9                      | 14              | 10.8         | 12         | 42.30      | 14.16      | 88.08  | 29.47 | 33.48 | 4.81  | 13.10 | N                                |
| Male      | Unknown              | 51                     | 31              | 9.4          | 12         | 34.24      | 11.27      | 89.18  | 29.34 | 32.91 | 3.84  | 13.98 | N                                |
| Male      | White                | 8                      | 6               | 11.5         | 12         | 39.23      | 12.81      | 85.09  | 27.76 | 32.67 | 4.62  | 13.47 | N                                |
| Female    | White                | 9                      | 53              | 8.6          | 13         | 36.32      | 12.52      | 84.27  | 29.00 | 34.48 | 4.32  | 14.40 | N                                |
| Male      | White                | 6                      | 7               | 12.4         | 13         | 34.77      | 11.67      | 79.98  | 26.81 | 33.56 | 4.35  | 12.67 | N                                |
| Male      | White                | 12                     | 4               | 15.7         | 16         | 36.89      | 12.03      | 86.21  | 28.11 | 32.61 | 4.28  | 13.27 | N                                |
| Male      | White                | 14                     | 10              | 16.2         | 17         | 37.67      | 12.74      | 91.76  | 31.04 | 33.83 | 4.11  | 12.25 | N                                |
| Female    | White                | 85                     | 33              | 15.3         | 18         | 29.84      | 10.15      | 85.81  | 29.17 | 34.01 | 3.48  | 14.66 | N                                |
| Male      | White                | 13                     | 35              | 15.1         | 18         | 37.96      | 13.36      | 89.15  | 31.26 | 35.25 | 4.28  | 13.02 | N                                |
| Male      | White                | 20                     | 66              | 12.5         | 18         | 41.97      | 14.4       | 86.16  | 29.45 | 34.31 | 4.89  | 14.19 | N                                |
| Male      | White                | 15                     | 83              | 12.1         | 19         | 38.39      | 12.75      | 86.03  | 28.58 | 33.22 | 4.46  | 12.17 | N                                |
| Male      | White                | 34                     | 18              | 17.5         | 19         | 35.38      | 11.12      | 70.68  | 22.24 | 31.43 | 5     | 17.89 | N                                |
| Male      | White                | 23                     | 55              | 16.4         | 21         | 32.8       | 10.92      | 77.49  | 25.82 | 33.29 | 4.23  | 15.63 | N                                |
| Male      | White                | 11                     | 49              | 17.9         | 22         | 42.8       | 14.47      | 91.53  | 30.96 | 33.61 | 4.674 | 12.4  | N                                |
| Female    | White                | 10                     | 16              | 21.7         | 23         | 41.79      | 13.35      | 85.9   | 27.45 | 31.95 | 4.864 | 14.52 | N                                |
| Female    | White                | 22                     | 50              | 18.8         | 23         | 38.17      | 13.02      | 93.33  | 31.83 | 34.11 | 4.09  | 11.94 | N                                |
| Male      | White                | 9                      | 1               | 22.9         | 23         | 37.69      | 12.72      | 91.1   | 30.72 | 33.75 | 4.14  | 12.08 | N                                |
| Female    | White                | 4                      | 0               | 24.0         | 24         | 31.93      | 10.58      | 72.6   | 24.05 | 33.13 | 4.4   | 14.78 | N                                |
| Female    | White                | 8                      | 13              | 22.9         | 24         | 39.98      | 13.14      | 93.01  | 30.56 | 32.86 | 4.30  | 14.13 | N                                |
| Male      | White                | 13                     | 93              | 17.3         | 25         | 39.36      | 13.52      | 85.61  | 29.39 | 34.35 | 4.6   | 13.1  | N                                |
| Female    | White                | 22                     | 34              | 23.2         | 26         | 39.71      | 13.45      | 85.24  | 28.88 | 33.88 | 4.66  | 12.44 | N                                |
| Female    | White                | 4                      | 135             | 19.8         | 31         | 42.42      | 13.74      | 80.08  | 25.94 | 32.40 | 5.30  | 13.25 | N                                |
| Female    | White                | 10                     | 122             | 20.8         | 31         | 40.02      | 13.53      | 85.25  | 28.83 | 33.81 | 4.69  | 11.62 | N                                |
| Female    | White                | 18                     | 1               | 30.9         | 31         | 38.11      | 12.39      | 94.57  | 30.82 | 32.51 | 4.02  | 13.68 | N                                |
| Male      | Unknown              | 11                     | 111             | 21.8         | 31         | 39.54      | 13.44      | 86.02  | 29.27 | 33.99 | 4.59  | 12.58 | N                                |
| Female    | White                | 4                      | 45              | 30.3         | 34         | 34.65      | 10.73      | 93.55  | 28.54 | 30.97 | 3.76  | 16.58 | N                                |
| Female    | White                | 4                      | 5               | 33.6         | 34         | 40.00      | 13.30      | 86.28  | 28.68 | 33.25 | 4.64  | 12.65 | N                                |
| Female    | Unknown              | 11                     | 91              | 27.4         | 35         | 35.31      | 11.83      | 88.62  | 29.67 | 33.50 | 3.99  | 13.85 | N                                |
| Female    | White                | 2                      | 12              | 36.0         | 37         | 35.75      | 11.7       | 85.3   | 27.89 | 32.73 | 4.195 | 13.75 | N                                |
| Female    | White                | 2                      | 14              | 35.8         | 37         | 41.70      | 14.80      | 96.10  | 34.10 | 35.49 | 4.34  | 13.25 | N                                |
| Male      | Black/African Amer   | 20                     | 1               | 36.9         | 37         | 26.81      | 9          | 93.73  | 31.47 | 33.57 | 2.86  | 21.93 | N                                |
| Female    | White                | 165                    | 126             | 29.5         | 40         | 34.99      | 11.13      | 76.76  | 24.41 | 31.81 | 4.56  | 16.53 | N                                |
| 2 Females | White                | 2                      | 0               | 41.0         | 41         | 30.60      | 10.35      | 86.00  | 29.23 | 33.82 | 3.58  | 16.85 | N                                |
| Female    | White                | 6                      | 0               | 42.0         | 42         | 39.68      | 13.03      | 89.98  | 29.54 | 32.84 | 4.41  | 12.88 | N                                |
| Male      | White                | 10                     | 42              | 38.5         | 42         | 40.69      | 13.72      | 81.85  | 27.61 | 33.72 | 4.97  | 15.38 | N                                |
| Female    | White                | 22                     | 16              | 41.7         | 43         | 30.56      | 9.77       | 83.37  | 26.62 | 31.97 | 3.67  | 19.1  | N                                |
| Female    | White                | 18                     | 32              | 41.3         | 44         | 39.07      | 12.78      | 91.22  | 29.79 | 32.70 | 4.29  | 15.28 | N                                |
| Female    | Black/African Amer   | 25                     | 18              | 43.5         | 45         | 37.26      | 12.12      | 91.98  | 29.93 | 32.53 | 4.05  | 14.33 | N                                |
| Male      | Unknown              | 278                    | 3               | 44.8         | 45         | 26.17      | 9          | 88.71  | 30.51 | 34.39 | 2.95  | 13.19 | N                                |
| Male      | White                | 14                     | 21              | 44.3         | 46         | 38.26      | 12.31      | 83.2   | 26.76 | 32.17 | 4.6   | 14.71 | N                                |
| Male      | White                | 20                     | 8               | 45.3         | 46         | 38.41      | 13.05      | 86.96  | 29.55 | 33.98 | 4.42  | 13.69 | N                                |
| Male      | White                | 2                      | 12              | 46.0         | 47         | 42.9       | 14.7       | 92     | 31.48 | 34.27 | 4.67  | 14.8  | N                                |
| Female    | White                | 8                      | 187             | 32.4         | 48         | 36.03      | 12.16      | 83.96  | 28.27 | 33.73 | 4.30  | 12.23 | N                                |
| Male      | White                | 25                     | 225             | 29.3         | 48         | 37.57      | 12.43      | 89.97  | 29.74 | 33.08 | 4.18  | 15.91 | N                                |
| Female    | Black/African Amer   | 25                     | 2               | 48.8         | 49         | 27.32      | 9.23       | 80.2   | 26.99 | 33.78 | 3.42  | 16.03 | N                                |
| Female    | Hawaiian/Pac. Island | 122                    | 96              | 41.0         | 49         | 34.72      | 10.75      | 85.59  | 26.48 | 30.96 | 4.06  | 15.83 | N                                |
| Female    | White                | 4                      | 16              | 48.7         | 50         | 38.40      | 12.55      | 95.98  | 31.32 | 32.68 | 4.01  | 14.35 | N                                |
| Male      | White                | 54                     | 14              | 48.8         | 50         | 32.65      | 10.94      | 95.04  | 31.80 | 33.51 | 3.44  | 13.68 | N                                |
| Male      | White                | 3                      | 29              | 48.6         | 51         | 38.73      | 13         | 103.97 | 34.85 | 33.57 | 3.73  | 15.2  | N                                |
| Female    | Black/African Amer   | 19                     | 0               | 52.0         | 52         | 27.41      | 8.67       | 92.41  | 29.19 | 31.63 | 2.97  | 16.67 | N                                |
| Female    | White                | 6                      | 49              | 47.9         | 52         | 36.35      | 12.05      | 86.25  | 28.49 | 33.15 | 4.23  | 14.00 | N                                |
| Female    | Hawaiian/Pac. Island | 20                     | 29              | 50.6         | 53         | 38.59      | 12.48      | 88.53  | 28.55 | 32.33 | 4.37  | 16.28 | N                                |
| Female    | White                | 5                      | 8               | 52.3         | 53         | 42.62      | 14.36      | 98.7   | 33.21 | 33.69 | 4.324 | 13.36 | N                                |
| Female    | White                | 12                     | 0               | 53.0         | 53         | 37.23      | 12.77      | 97.68  | 33.52 | 34.30 | 3.81  | 13.39 | N                                |
| Female    | White                | 27                     | 3               | 52.8         | 53         | 36.37      | 12.46      | 86.32  | 29.58 | 34.26 | 4.21  | 12.13 | N                                |
| Male      | White                | 2                      | 16              | 51.7         | 53         | 39.85      | 12.9       | 84.95  | 27.51 | 32.37 | 4.69  | 16.15 | N                                |
| Female    | Unknown              | 11                     | 8               | 53.3         | 54         | 34.55      | 11.46      | 89.09  | 29.54 | 33.17 | 3.88  | 13.67 | N                                |
| Male      | White                | 4                      | 24              | 52.0         | 54         | 34.08      | 11.4       | 77.75  | 25.17 | 33.45 | 4.53  | 15.18 | N                                |
| Male      | White                | 12                     | 7               | 53.4         | 54         | 37.05      | 12.57      | 88.12  | 29.86 | 33.93 | 4.21  | 14.23 | N                                |
| 6 males   | White                | 6                      | 7               | 55.1         | 55         | 34.87      | 11.63      | 85.83  | 28.59 | 33.29 | 4.06  | 14.89 | N                                |
| Male      | White                | 2                      | 24              | 53.0         | 55         | 45.25      | 15.45      | 85.15  | 29.07 | 34.14 | 5.32  | 14.00 | N                                |
| Male      | White                | 13                     | 448             | 18.7         | 56         | 40.73      | 13.99      | 92.69  | 31.81 | 34.34 | 4.40  | 11.99 | N                                |
| Male      | White                | 14                     | 28              | 53.7         | 56         | 39.66      | 13.57      | 84.61  | 29.00 | 34.22 | 4.68  | 13.37 | N                                |
| Female    | Unknown              | 23                     | 33              | 54.3         | 57         | 38.24      | 12.75      | 88.94  | 29.63 | 33.35 | 4.30  | 13.78 | N                                |
| Male      | Asian                | 10                     | 10              | 57.2         | 58         | 34.43      | 11.89      | 93.85  | 32.49 | 34.53 | 3.66  | 13.12 | N                                |
| Female    | Black/African Amer   | 14                     | 10              | 58.2         | 59         | 32.96      | 10.54      | 88.11  | 28.18 | 31.98 | 3.74  | 13.74 | N                                |
| Female    | White                | 6                      | 1               | 59.9         | 60         | 37.25      | 12.75      | 86.68  | 29.69 | 34.23 | 4.30  | 14.80 | N                                |
| Male      | White                | 2                      | 12              | 59.0         | 60         | 39.05      | 12.45      | 75.9   | 24.17 | 31.88 | 5.15  | 16.75 | N                                |
| Male      | White                | 3                      | 14              | 58.8         | 60         | 33.2       | 11.23      | 88.93  | 30.11 | 33.83 | 3.73  | 13.8  | N                                |
| Female    | Black/African Amer   | 109                    | 113             | 51.6         | 61         | 31.52      | 10.67      | 92.24  | 31.29 | 33.85 | 3.41  | 12.85 | N                                |
| Male      | White                | 2                      | 12              | 60.0         | 61         | 36.45      | 11.75      | 88.55  | 28.52 | 32.24 | 4.12  | 16.1  | N                                |
| Male      | White                | 102                    | 72              | 55.0         | 61         | 42.67      | 14.18      | 85.97  | 28.59 | 33.23 | 4.96  | 14.93 | N                                |
| Female    | White                | 6                      | 13              | 60.9         | 62         | 40.33      | 13.92      | 91.43  | 31.53 | 34.50 | 4.41  | 12.93 | N                                |
| Male      | Asian                | 10                     | 41              | 59.6         | 63         | 39.49      | 13.31      | 95.49  | 32.15 | 33.70 | 4.14  | 12.96 | N                                |
| Male      | White                | 5                      | 76              | 56.7         | 63         | 43.68      | 15.26      | 84.58  | 29.57 | 34.94 | 5.16  | 12.82 | N                                |
| Male      | Unknown              | 77                     | 2               | 63.8         | 64         | 27.45      | 9.55       | 91.94  | 31.94 | 34.79 | 2.99  | 18.61 | N                                |
| Male      | White                | 26                     | 99              | 55.8         | 64         | 40.96      | 13.57      | 97.06  | 32.00 | 33.13 | 4.24  | 13.27 | N                                |
| Female    | White                | 3                      | 138             | 54.5         | 66         | 40.47      | 13.93      | 91.00  | 31.43 | 34.43 | 4.43  | 13.20 | N                                |
| Female    | White                | 6                      | 0               | 69.0         | 69         | 43.72      | 14.48      | 97.87  | 32.45 | 33.13 | 4.46  | 13.43 | N                                |
| Male      | Black/African Amer   | 12                     | 2               | 69.8         | 70         | 31.57      | 9.98       | 76.99  | 24.34 | 31.61 | 4.1   | 17.46 | N                                |

Summary of red cell indices for patients suffering from Diabetes Insipidus. N= within normal range  
Red numbers are above and blue numbers are below normal range.
